# Supplementary material for: A highly efficient metal oxide incorporated metal organic framework [Nd2O3-MIL(Fe)-88A] for the electrochemical detection of dichlorvos
Source: Royal Society of Chemistry journal article supplement (doi:10.1039/d2ra07877e), 2023-01-01
Supplement: d2ra07877e1.pdf [file d2ra07877e1.pdf]

**Highly Efficient Metal Oxide Incorporated Metal Organic  
Framework [Nd<sub>2</sub>O<sub>3</sub>-MIL(Fe)-88A] for Electrochemical Detection of Dichlorvos**

Mariyammal Narayanan<sup>1</sup>, Narendra Pal Singh Chauhan<sup>2</sup> and Panneerselvam Perumal<sup>1\*</sup>

<sup>1</sup> - Department of Chemistry, SRM Institute of Science and Technology, Kattankulathur,  
603 203, Tamil Nadu, India

<sup>2</sup> - Department of Chemistry, Faculty of science, Bhupal Nobles University, Udaipur, 313002,  
Rajasthan, India.

\*Corresponding author email: [panneerp1@srmist.edu.in](mailto:panneerp1@srmist.edu.in); [panneerchem82@gmail.com](mailto:panneerchem82@gmail.com);

ORCID: <https://orcid.org/0000-0003-2647-6835>.

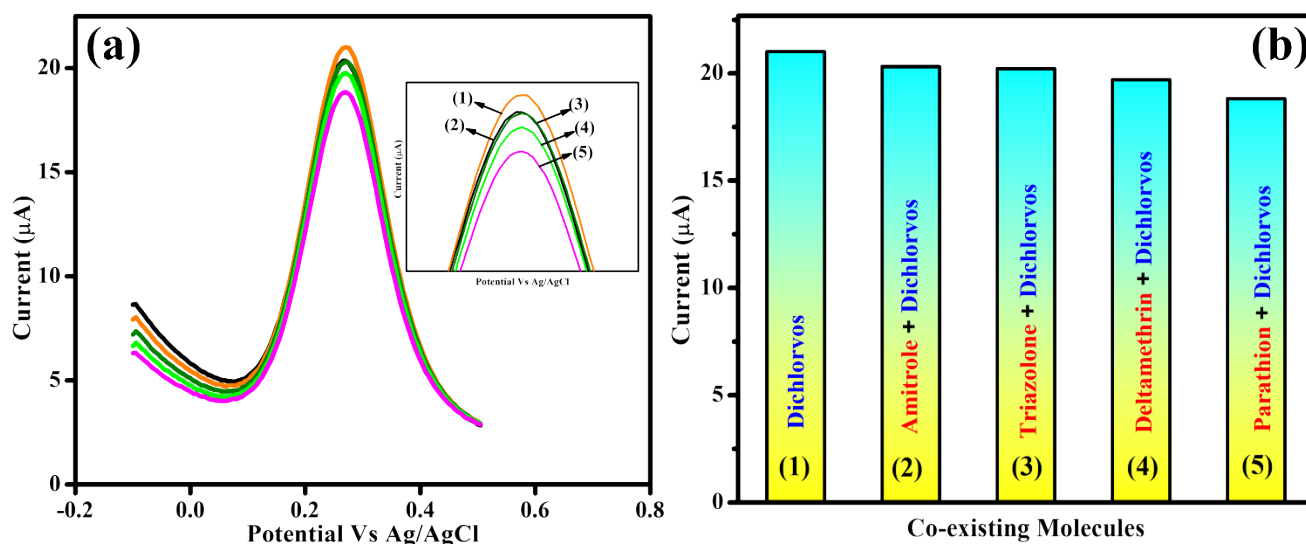

**Figure S1.** (a) DPV and (b) Current response of (1) dichlorvos in the presence of different Co-existing molecules (2) amitrole (chemical herbicide), (3) triazolone (triazole fungicide), (4) deltamethrin (pyrethroid), and (5) parathion.

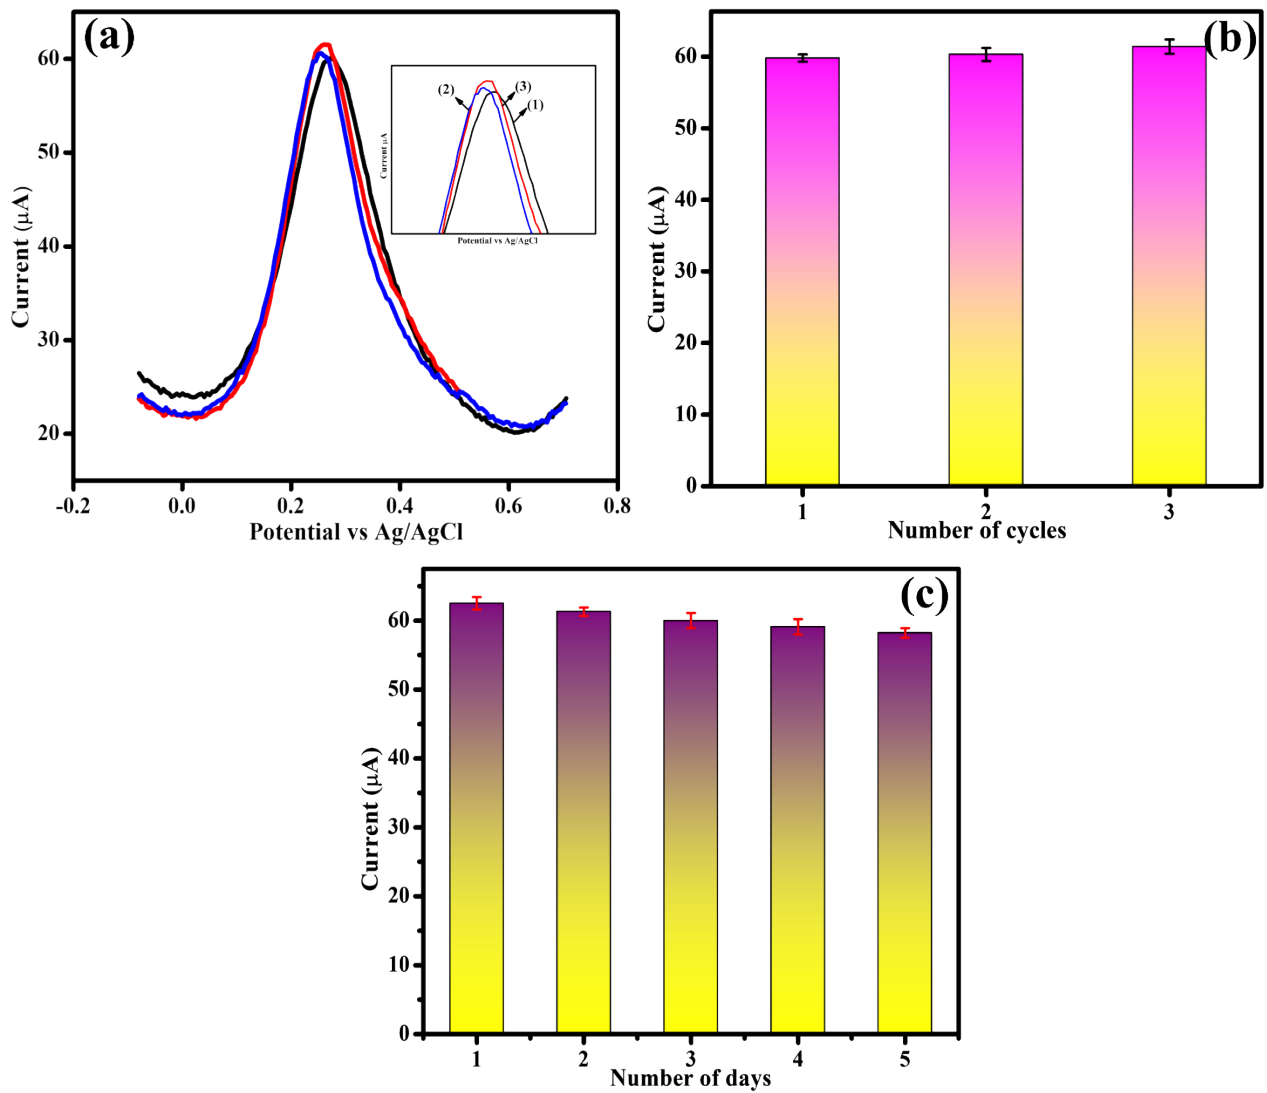

**Figure S2.** (a) Repeatability and Current response bar diagram of dichlorvos 1<sup>st</sup> Cycle (1), 2<sup>nd</sup> Cycle (2), 3<sup>rd</sup> Cycle (3) and (c) storage stability of the  $\text{Nd}_2\text{O}_3@\text{MIL}(\text{Fe})\text{-88A}$  electrode toward dichlorvos detection.

**Table S1.** Comparison table for previously reported DPV studies.

| <b>Modified sensor</b>                                               | <b>Method</b>                 | <b>Linear range</b>              | <b>LOD (nM)</b> | <b>Ref.</b> |
|----------------------------------------------------------------------|-------------------------------|----------------------------------|-----------------|-------------|
| Polymerizable luminescence probe                                     | Fluorescence spectra          | 0.5–7 ( $\mu\text{M}$ )          | 300             | [1]         |
| Polymerizable luminescence probe                                     | Spectrophotometry             | 50 – 200 ( $\mu\text{M}$ )       | 320             | [2]         |
| Carbon dots – Cu (II)                                                | Fluorescence quenching effect | 0.006-0.06( $\mu\text{M}$ )      | 38              | [3]         |
| Choline oxidase/ Poly(brilliant cresyl blue)/CNTs modified electrode | Amperometry                   | 2.5 – 60 ( $\mu\text{M}$ )       | 1.6             | [4]         |
| Acetylcholinesterase/rGO @ Nafion /GCE                               | Amperometry                   | 0.0226 – 0.453 ( $\mu\text{M}$ ) | 9.05            | [5]         |
| Acetylcholinesterase/chitosan @TiO <sub>2</sub> / rGO/ GCE           | DPV                           | 0.036–22.6 ( $\mu\text{M}$ )     | 29              | [6]         |
| Au@MWCNTs/GCE                                                        | DPV                           | 1-120 ( $\mu\text{M}$ )          | 5               | [7]         |
| ChOx/PBCBethaline-HNO <sub>3</sub> PTD                               | Amperometry                   | 2.5-60 (nM)                      | 1.6             | [8]         |
| Nd <sub>2</sub> O <sub>3</sub> @MIL(Fe)-88A/GCE                      | DPV                           | 1-250(nM)                        | 0.92            | This work   |

**Table S2.** The determination of Dichlorvos in the presence of purple cabbage and orange extracts.

| Samples         | Spiked<br>(nM) | Found<br>(nM) | Recovery<br>(%) | RSD<br>(%, n=3) |
|-----------------|----------------|---------------|-----------------|-----------------|
| Cabbage extract | 0              | N. F          | -               | -               |
|                 | 10             | 9.7 ± 0.02    | 97              | 2.16            |
|                 | 20             | 19.2 ± 0.06   | 96              | 3.39            |
|                 | 30             | 29.1 ± 0.04   | 97              | 1.40            |
| Orange extract  | 0              | N. F          | -               | -               |
|                 | 10             | 10.24 ± 0.02  | 102.4           | 2.26            |
|                 | 20             | 19.90 ± 0.04  | 99.5            | 2.11            |
|                 | 30             | 31.03 ± 0.02  | 103.4           | 0.64            |

**Note:** N.F = Not Found

## References

- [1] Ibrahim, A. M. Abbas and H. M. Darwish, *Luminescence*, 2017, **32**, 1541–1546.
- [2] H. A. Azab, A. S. Orabi and A. M. Abbas, *J. Lumin*, 2015, **167**, 360–370.
- [3] J. Hou, G. Dong, Z. Tian, J. Lu, Q. Wang, S. Ai and M. Wang, *Food Chem.*, 2016, **202**, 81–87.
- [4] W. Da Silva, M. E. Ghica and C. M. A. Brett, *Sens. Actuators B. Chem*, 2019, **298**, 126862.
- [5] S. Wu, F. Huang, X. Lan, X. Wang, J. Wang and C. Meng, *Sens. Actuators B. Chem*, 2013, **177**, 724–729.
- [6] H. F. Cui, W. W. Wu, M. M. Li, X. Song, Y. Lv and T. T. Zhang, *Biosens. Bioelectron.*, 2018, **99**, 223–229.
- [7] Y. Chen, *Int. J. Electrochem. Sci.*, 2021, 210321.

[8] O. Tutunaru, C. M. Mihailescu, M. Savin, B. C. Tincu, M. C. Stoian, G. S. Muscalu, B. Firtat, S. Dinulescu, G. Craciun, C. A. Moldovan, A. Ficai and A. C. Ion, *Microchem. J.*, 2021, **169**, 106573.
